# Supplementary material for: Metabolomics and Microbiomics Insights into Differential Surface Fouling of Three Macroalgal Species of Fucus (Fucales, Phaeophyceae) That Co-Exist in the German Baltic Sea
Source: MDPI journal article supplement (doi:10.3390/md21110595), 2023-11-16
Supplement: s1 [file s1]

# Metabolomics and Microbiomics Insights into Differential Surface Fouling of Three Macroalgal Species of *Fucus* (Fucales, Phaeophyceae) that Co-exist in the German Baltic Sea

Ernest Oppong-Danquah <sup>1</sup>, Martina Blümel <sup>1</sup> and Deniz Tasdemir <sup>1,2,\*</sup>

<sup>1</sup> GEOMAR Centre for Marine Biotechnology (GEOMAR-Biotech), Research Unit Marine Natural Products Chemistry, GEOMAR Helmholtz Centre for Ocean Research Kiel, Wischhofstrasse 1-3, 24148 Kiel, Germany; eoppong-danquah@geomar.de (E.O.-D.); mbluemel@geomar.de (M.B.)

<sup>2</sup> Faculty of Mathematics and Natural Science, Kiel University, Christian-Albrechts-Platz 4, 24118 Kiel, Germany

\* Correspondence: dtasdemir@geomar.de; Tel.: +49-431-6004430

## List of Figures

## Page No.

|                                                                                                                                       |    |
|---------------------------------------------------------------------------------------------------------------------------------------|----|
| <b>Figure S1:</b> UPLC-MS(+) base peak chromatograms of Surface Adsorption (SA) extracts of A) FE, B) FS and C) FV                    | 3  |
| <b>Figure S2:</b> UPLC-MS(+) base peak chromatograms of Solvent Dipping (SD) extracts of A) FE, B) FS and C) FV                       | 4  |
| <b>Figure S3:</b> UPLC-MS(+) base peak chromatograms of Surface-free after adsorption (SFA) extracts of A) FE, B) FS and C) FV        | 5  |
| <b>Figure S4:</b> UPLC-MS(+) base peak chromatograms of Surface-free after dipping (SFD) extracts of A) FE, B) FS and C) FV           | 6  |
| <b>Figure S5:</b> UPLC-MS(+) base peak chromatograms of Whole (W) extracts of A) FE, B) FS and C) FV                                  | 7  |
| <b>Figure S6:</b> MN generated from UPLC-(-)-ESI-MS/MS data of all extracts of <i>Fucus</i> spp. in the negative ion mode             | 8  |
| <b>Figure S7:</b> Variation of the most significant discriminatory metabolite markers (VIP >1.8) on the surfaces of <i>Fucus</i> spp. | 9  |
| <b>Figure S8:</b> MS/MS spectra of [M + H] <sup>+</sup> ion of ulvaline at <i>m/z</i> 236.1 displaying the typical product ions       | 10 |
| <b>Figure S9:</b> MS/MS spectra of [M + H] <sup>+</sup> ion of MGTA 20:4 at <i>m/z</i> 522.3 displaying the typical product ions      | 11 |
| <b>Figure S10:</b> MS/MS spectra of [M + H] <sup>+</sup> ion of MGTA 18:1 at <i>m/z</i> 500.4 displaying the typical product ions     | 12 |
| <b>Figure S11:</b> PCA scores plot generated from UPLC-(+)-ESI-MS data of all extracts                                                | 13 |
| <b>Figure S12:</b> MN generated from UPLC-(+)-ESI-MS/MS data of all surface-free and whole extracts                                   | 14 |
| <b>Figure S13:</b> Rarefaction curves of bacterial V3/V4 region amplicon sequences from all 66 samples                                | 15 |
| <b>Figure S14:</b> Alpha diversity (ASV-Observed vs. Shannon) of bacterial epiphytic community with regard to sample source           | 16 |

|                                                                                                                                                               |    |
|---------------------------------------------------------------------------------------------------------------------------------------------------------------|----|
| <b>Figure S15.</b> Alpha diversity (ASV-Observed vs. Shannon) of bacterial epiphytic community with regard to individual.                                     | 17 |
| <b>Figure S16.</b> Beta diversity analysis of bacterial amplicon data based on Bray-Curtis distance calculation on <i>Fucus</i> spp.                          | 18 |
| <b>Figure S17.</b> Bacterial orders associated with surfaces of <i>Fucus</i> spp.                                                                             | 19 |
| <b>Figure S18.</b> Rarefaction curves of eukaryotic ITS region amplicon sequences from all 60 samples.                                                        | 20 |
| <b>Figure S19.</b> Alpha diversity (ASV-Observed vs. Shannon) of eukaryotic epiphytic community based on ITS fragment sequences with regard to sample source. | 21 |
| <b>Figure S20.</b> Alpha diversity (ASV-Observed vs. Shannon) of eukaryotic epiphytic community based on ITS fragment sequences with regard to individual     | 22 |
| <b>Figure S21.</b> Alpha diversity (ASV-Observed vs. Shannon) of fungal epiphytic community based on ITS fragment sequences with regard to sample source.     | 23 |
| <b>Figure S22.</b> Alpha diversity (ASV-Observed vs. Shannon) of fungal epiphytic community based on ITS fragment sequences with regard to individual.        | 24 |
| <b>Figure S23.</b> Fungal orders associated to surfaces of <i>Fucus</i> spp., stone biofilm (BF) and seawater (SW) reference samples                          | 25 |

#### List of Tables

|                                                                                                                                         | <u>Page No.</u> |
|-----------------------------------------------------------------------------------------------------------------------------------------|-----------------|
| <b>Table S2.</b> Relative abundances of bacterial genera (> 1%) associated to surfaces <i>Fucus</i> spp., Seawater and stone biofilm    | 26              |
| <b>Table S3.</b> Bacterial beta diversity statistics based on Bray-Curtis dissimilarity                                                 | 27              |
| <b>Table S4.</b> Relative abundances of eukaryote genera (> 1%) associated to surfaces of <i>Fucus</i> spp., seawater and stone biofilm | 28              |
| <b>Table S5.</b> ITS beta diversity statistics based on Bray-Curtis dissimilarity                                                       | 29              |
| <b>Table S6.</b> Relative abundances of fungal genera (>1%) associated to surfaces of <i>Fucus</i> sp., seawater and stone biofilm      | 30              |

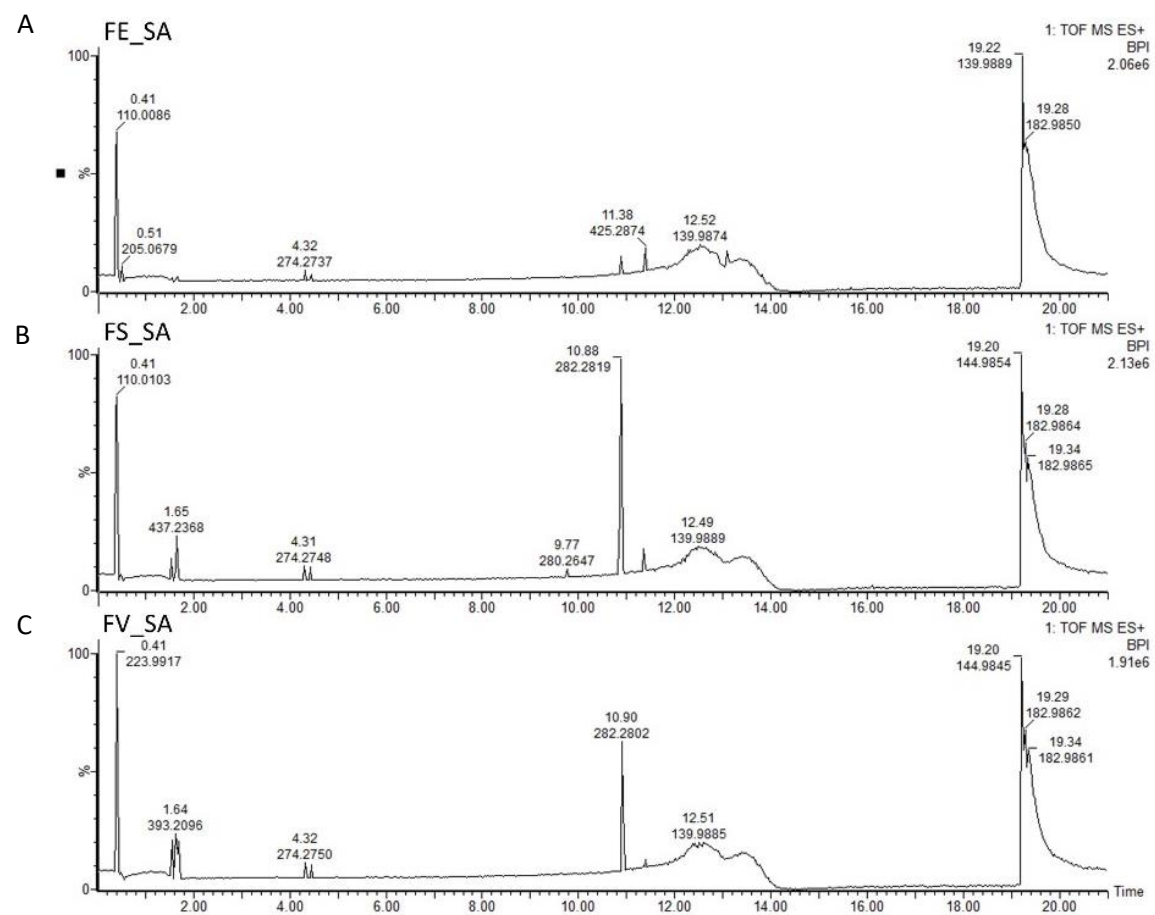

**Figure S1.** UPLC-MS(+) base peak chromatograms of Surface Adsorption (SA) extracts of A) FE, B) FS and C) FV

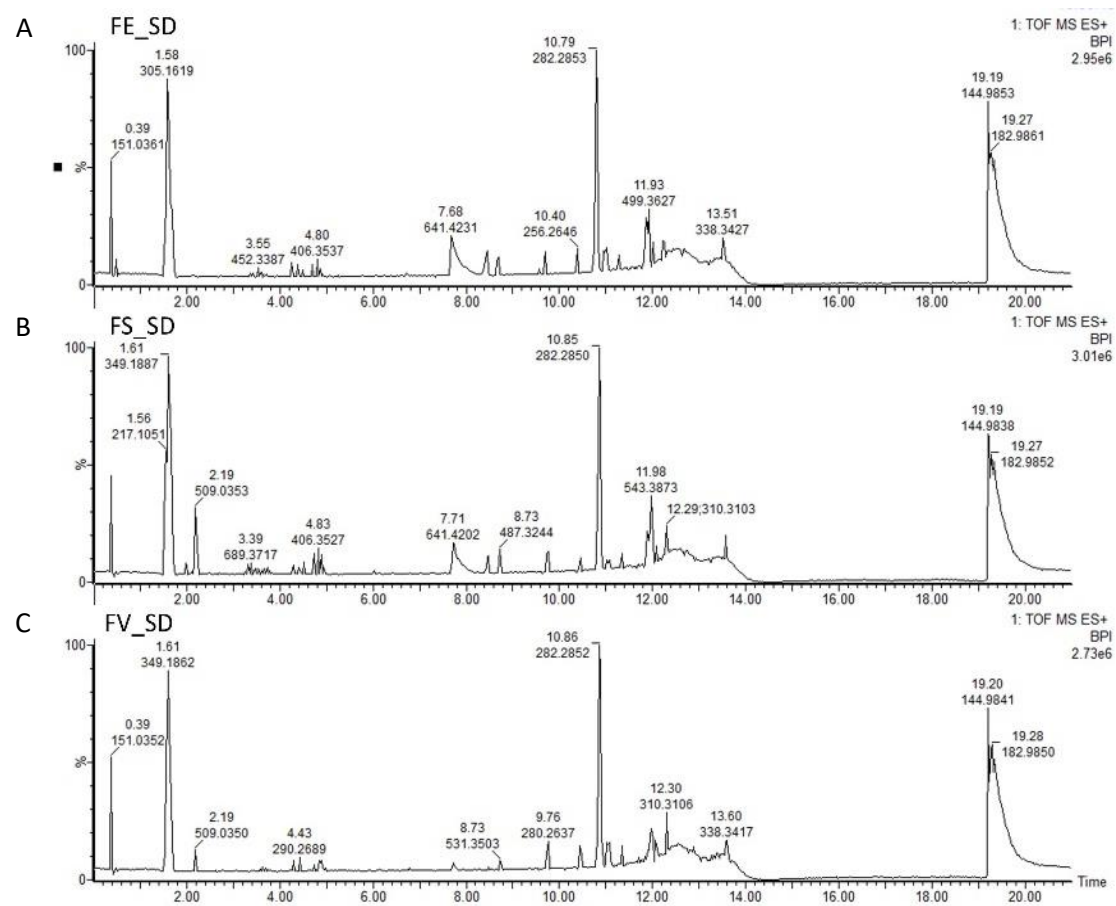

**Figure S2.** UPLC-MS(+) base peak chromatograms of Solvent Dipping (SD) extracts of A) FE, B) FS and C) FV

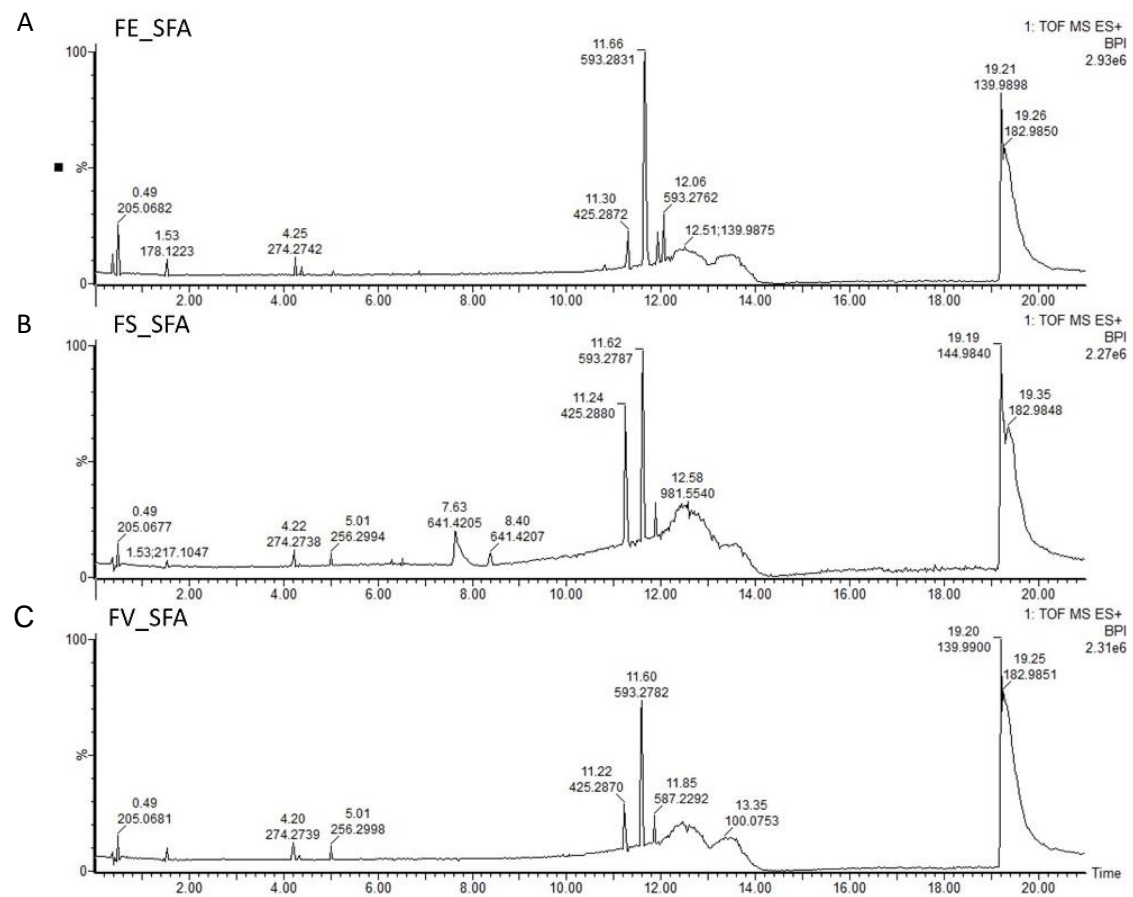

**Figure S3.** UPLC-MS(+) base peak chromatograms of Surface-free after adsorption (SFA) extracts of A) FE, B) FS and C) FV

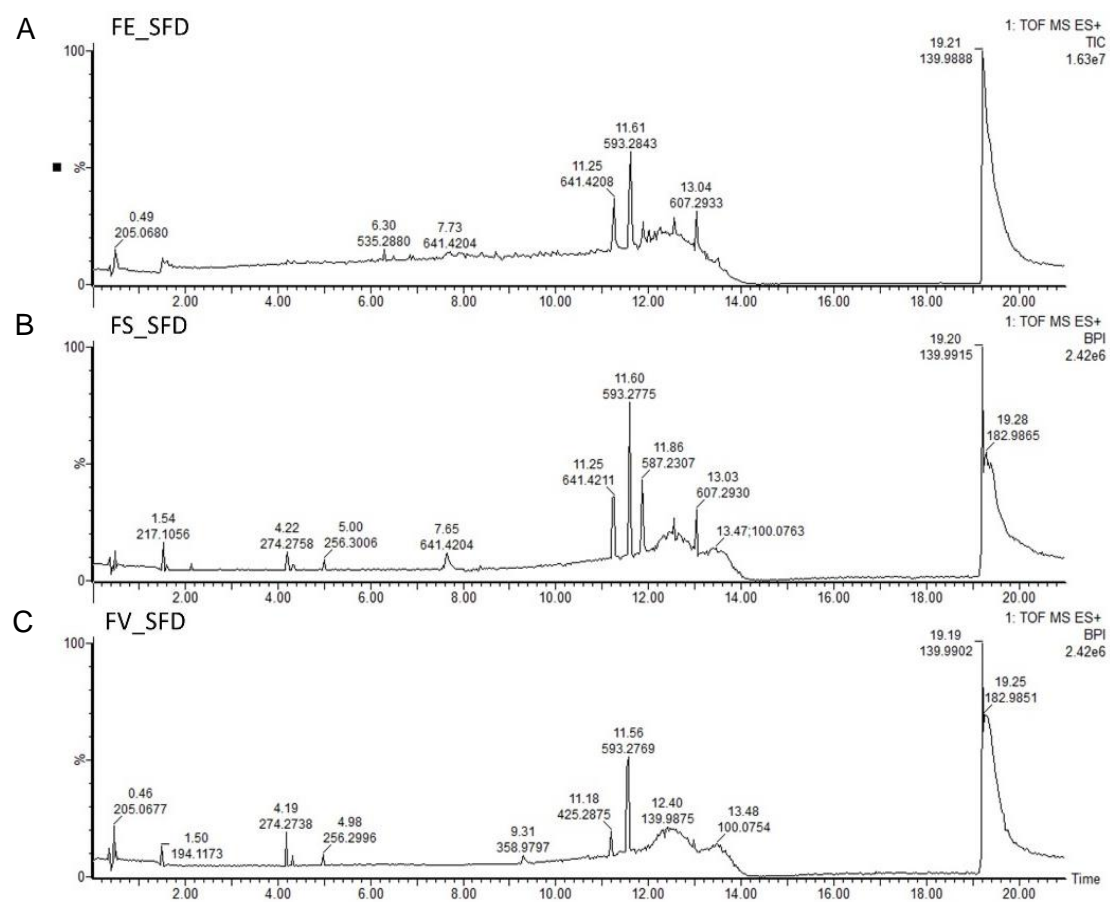

**Figure S4.** UPLC-MS(+) base peak chromatograms of Surface-free after dipping (SFD) extracts of A) FE, B) FS and C) FV

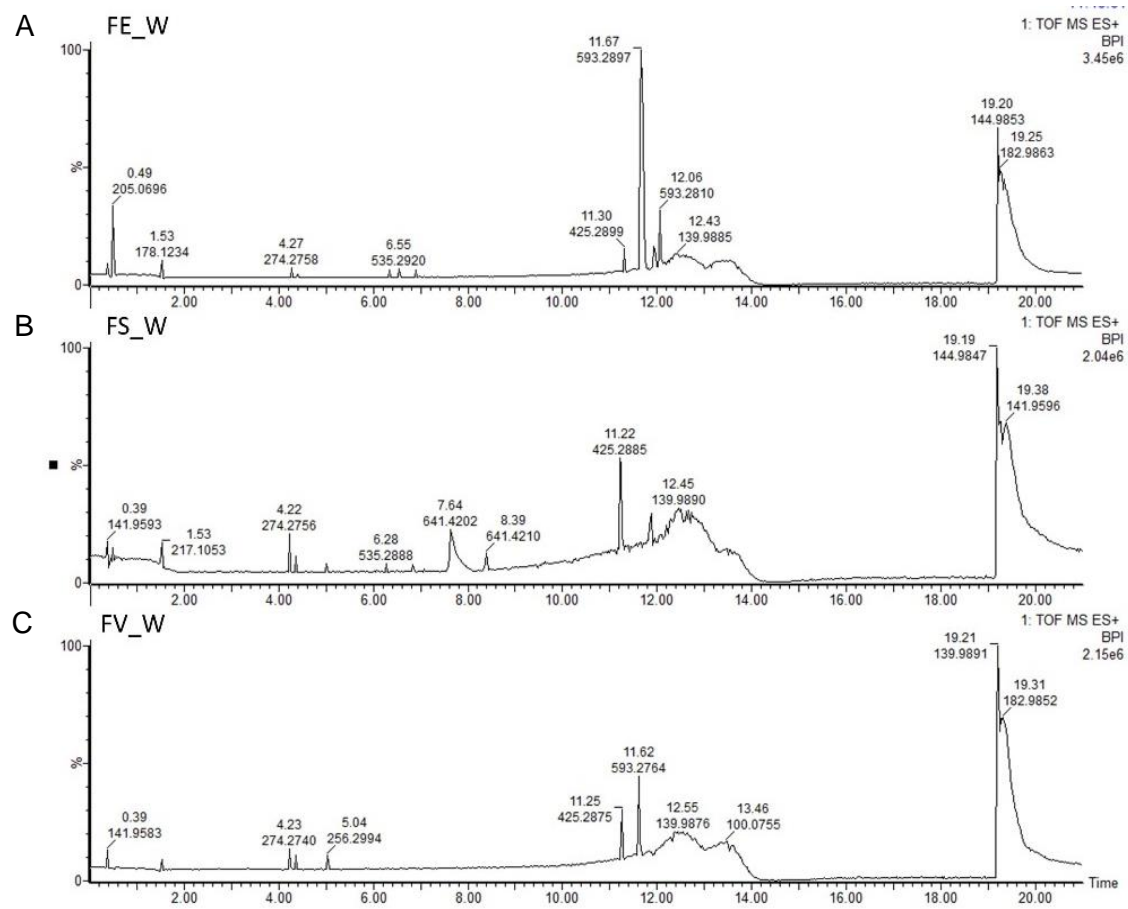

**Figure S5.** UPLC-MS(+) base peak chromatograms of Whole (W) extracts of A) FE, B) FS and C) FV

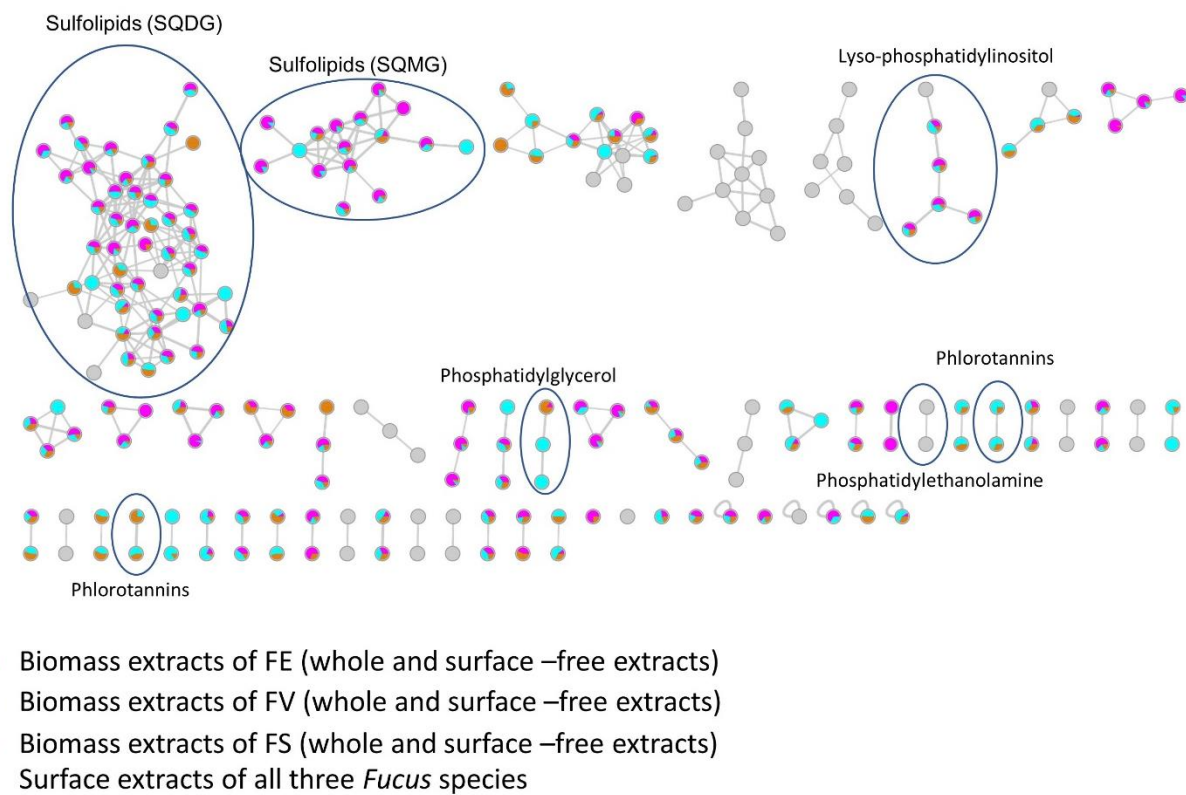

**Figure S6.** MN generated from UPLC(-)-ESI-MS/MS data of all extracts of *Fucus* spp. in the negative ion mode. Node colour represents the source of the ion.



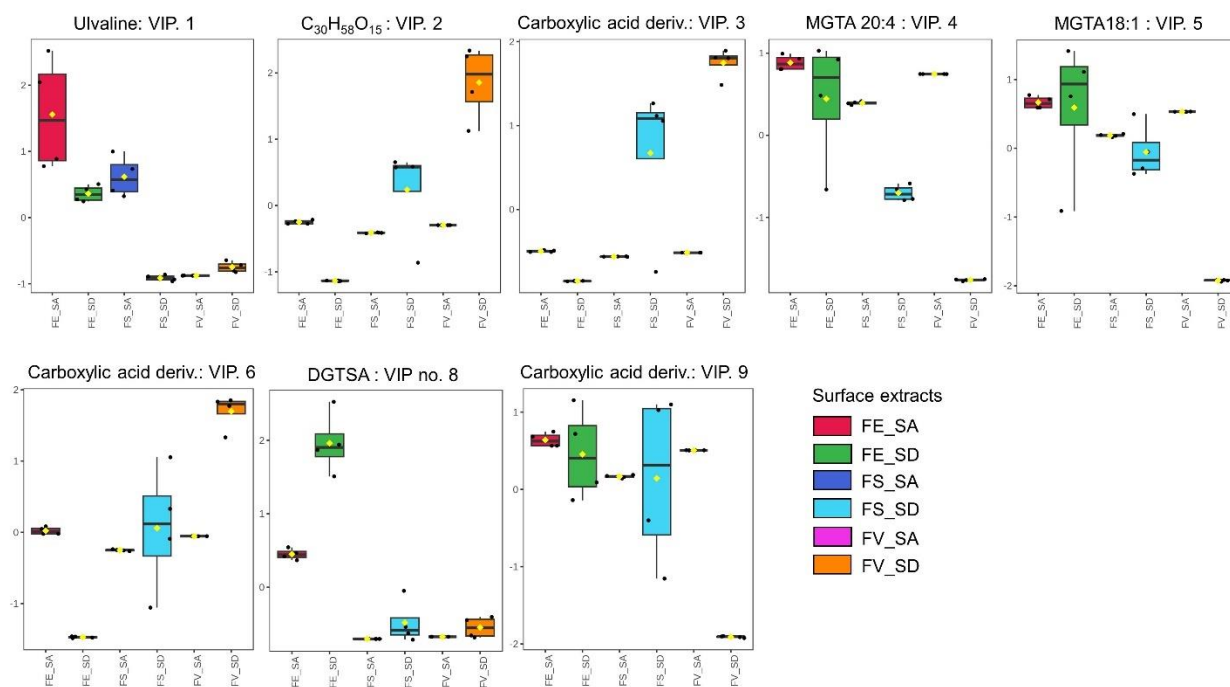

**Figure S7.** Variation of the most significant discriminatory metabolite markers (VIP > 1.8) on the surfaces of the three *Fucus* spp. Normalized intensities are presented on the y-axis.

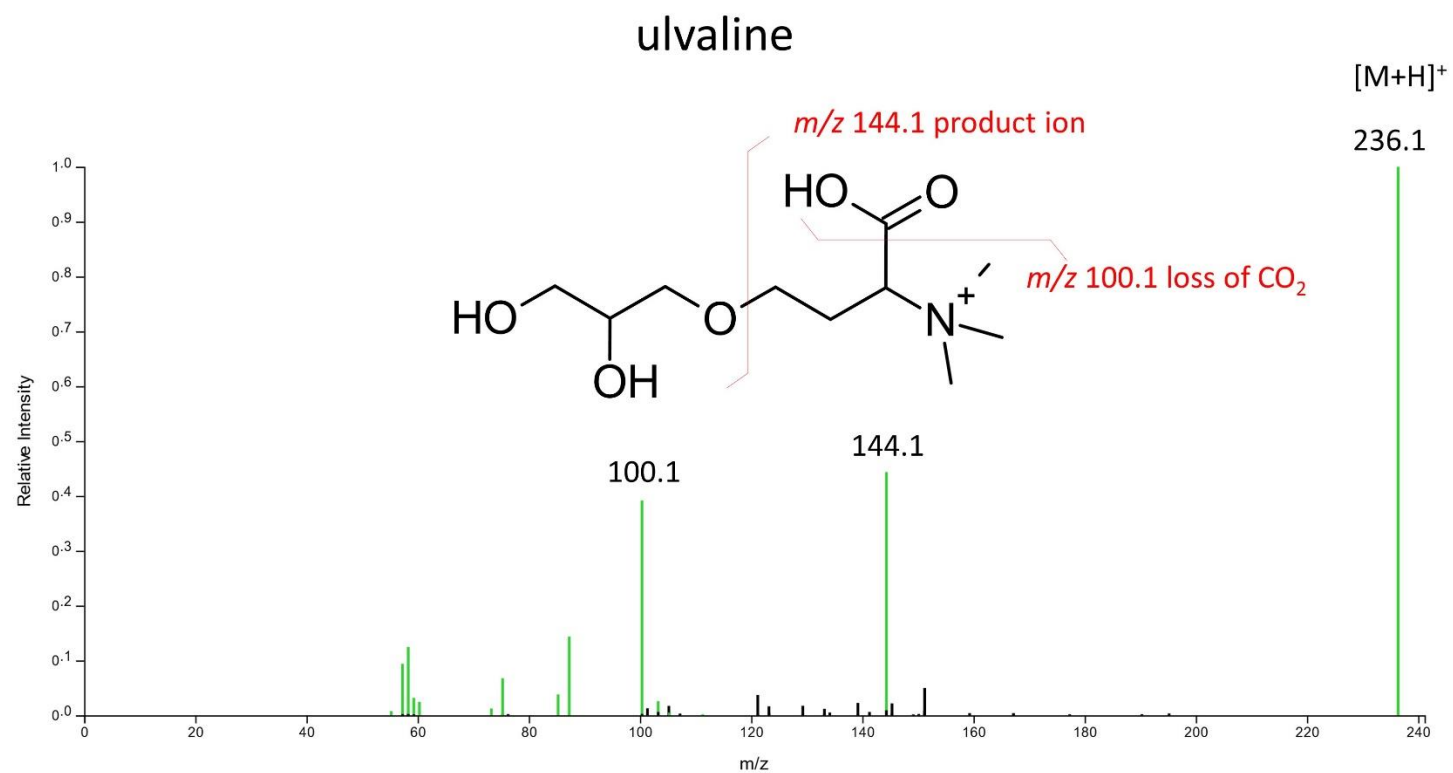

**Figure S8.** MS/MS spectra of  $[\text{M} + \text{H}]^+$  ion of ulvaline at  $m/z$  236.1 displaying the typical product ions.

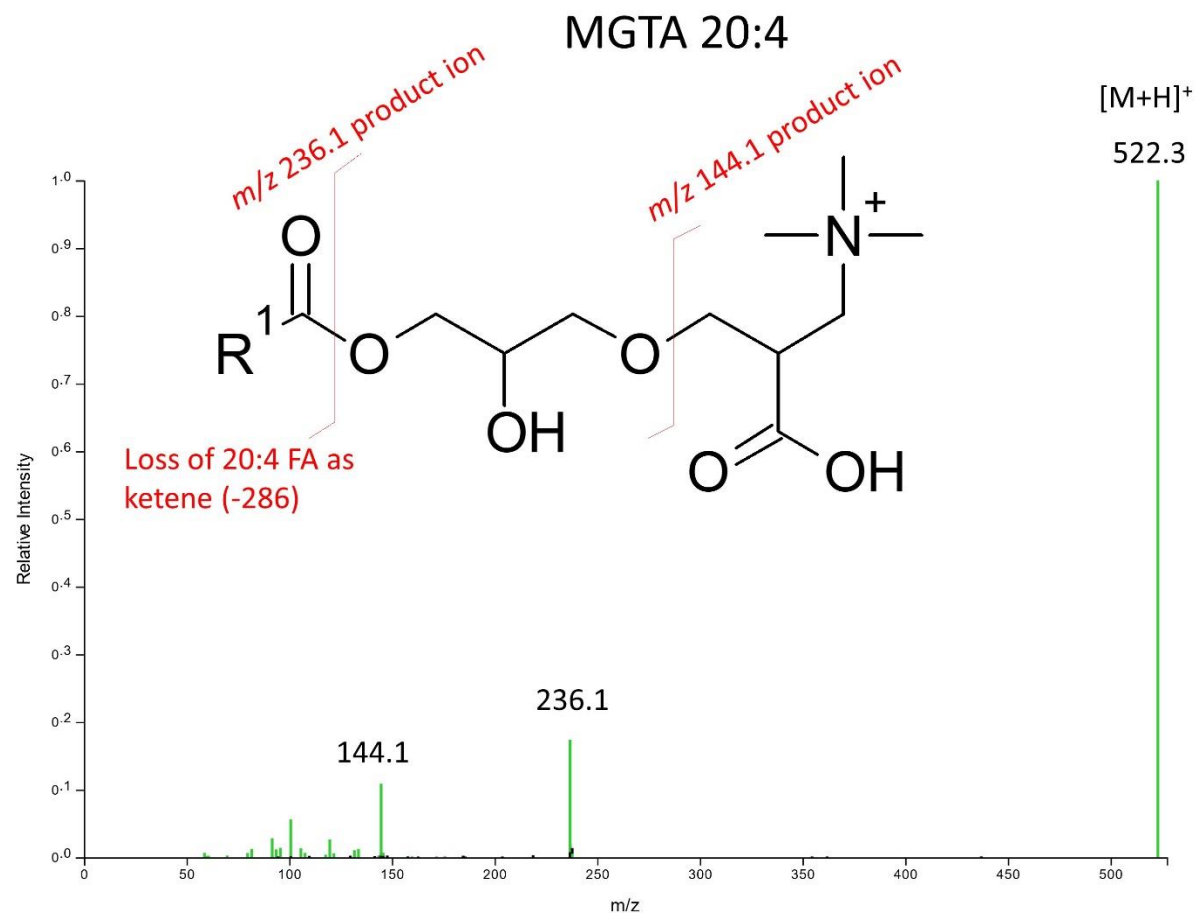

**Figure S9.** MS/MS spectra of  $[M + H]^+$  ion of MGTA 20:4 at  $m/z$  522.3 displaying the typical product ions.

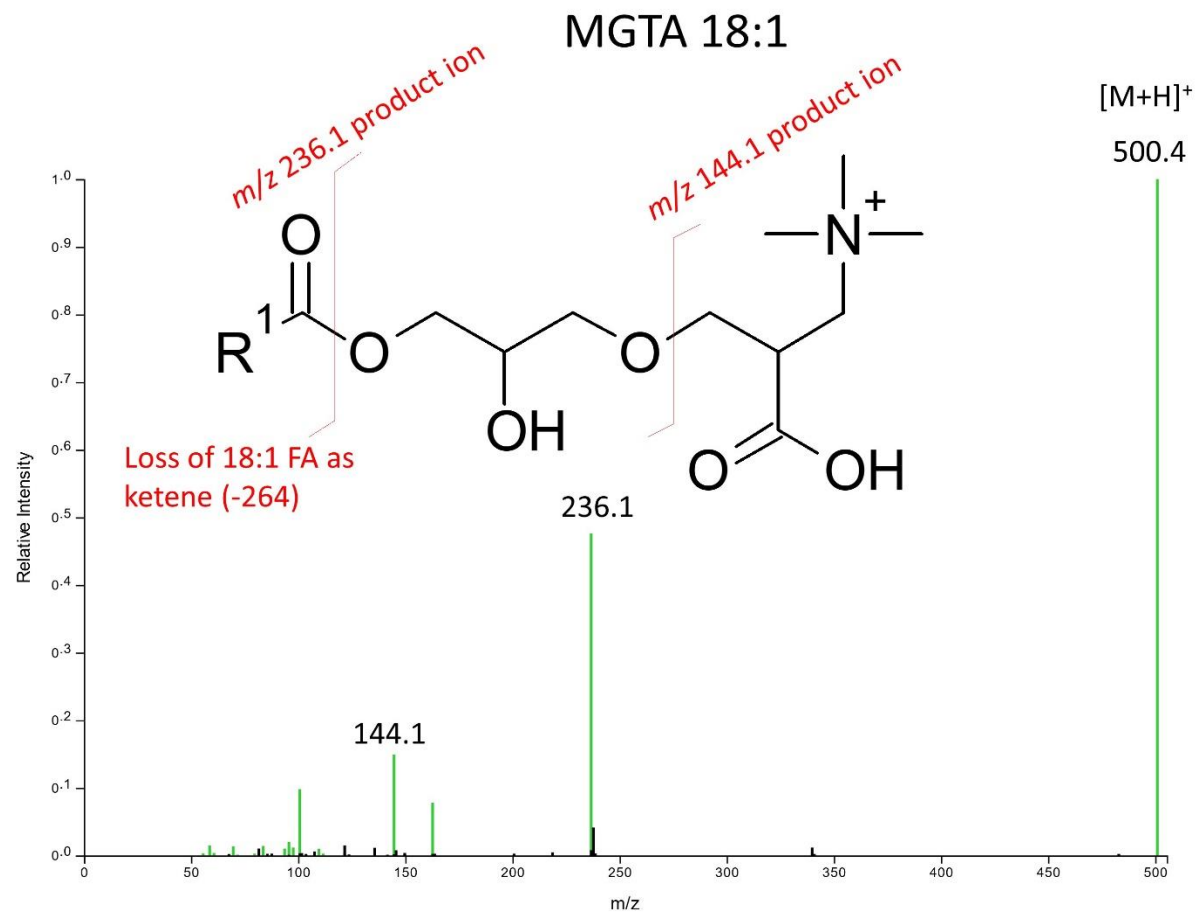

**Figure S10.** MS/MS spectra of  $[M + H]^+$  ion of MGTA 18:1 at  $m/z$  500.4 displaying the typical product ions.

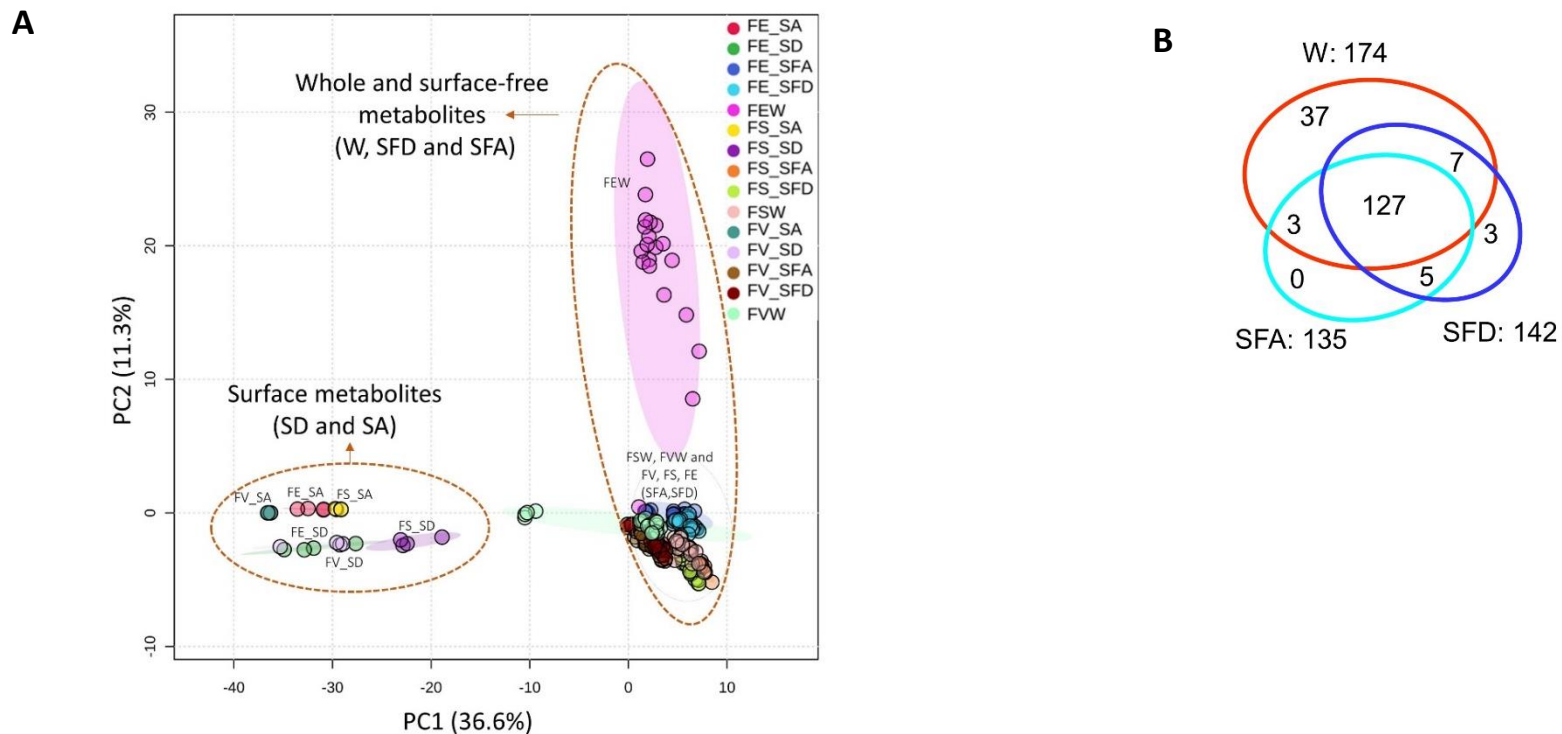

**Figure S11.** PCA scores plot generated from UPLC-(+)-ESI-MS data of all extracts showing a clear discrimination between surface metabolites from surface free and whole metabolome. Algal species: FV: *F. vesiculosus*, FS: *F. serratus*, FE: *F. distichus* subsp. *evanescens*, Extracts: SA: surface adsorption, SD: solvent dipping, SFA: surface-free after adsorption, SFD: surface-free after dipping, W: whole, untreated algae (B) Venn diagram showing distribution of nodes among the whole extracts (W), surface-free extract after adsorption (SFA) and dipping (SFD).

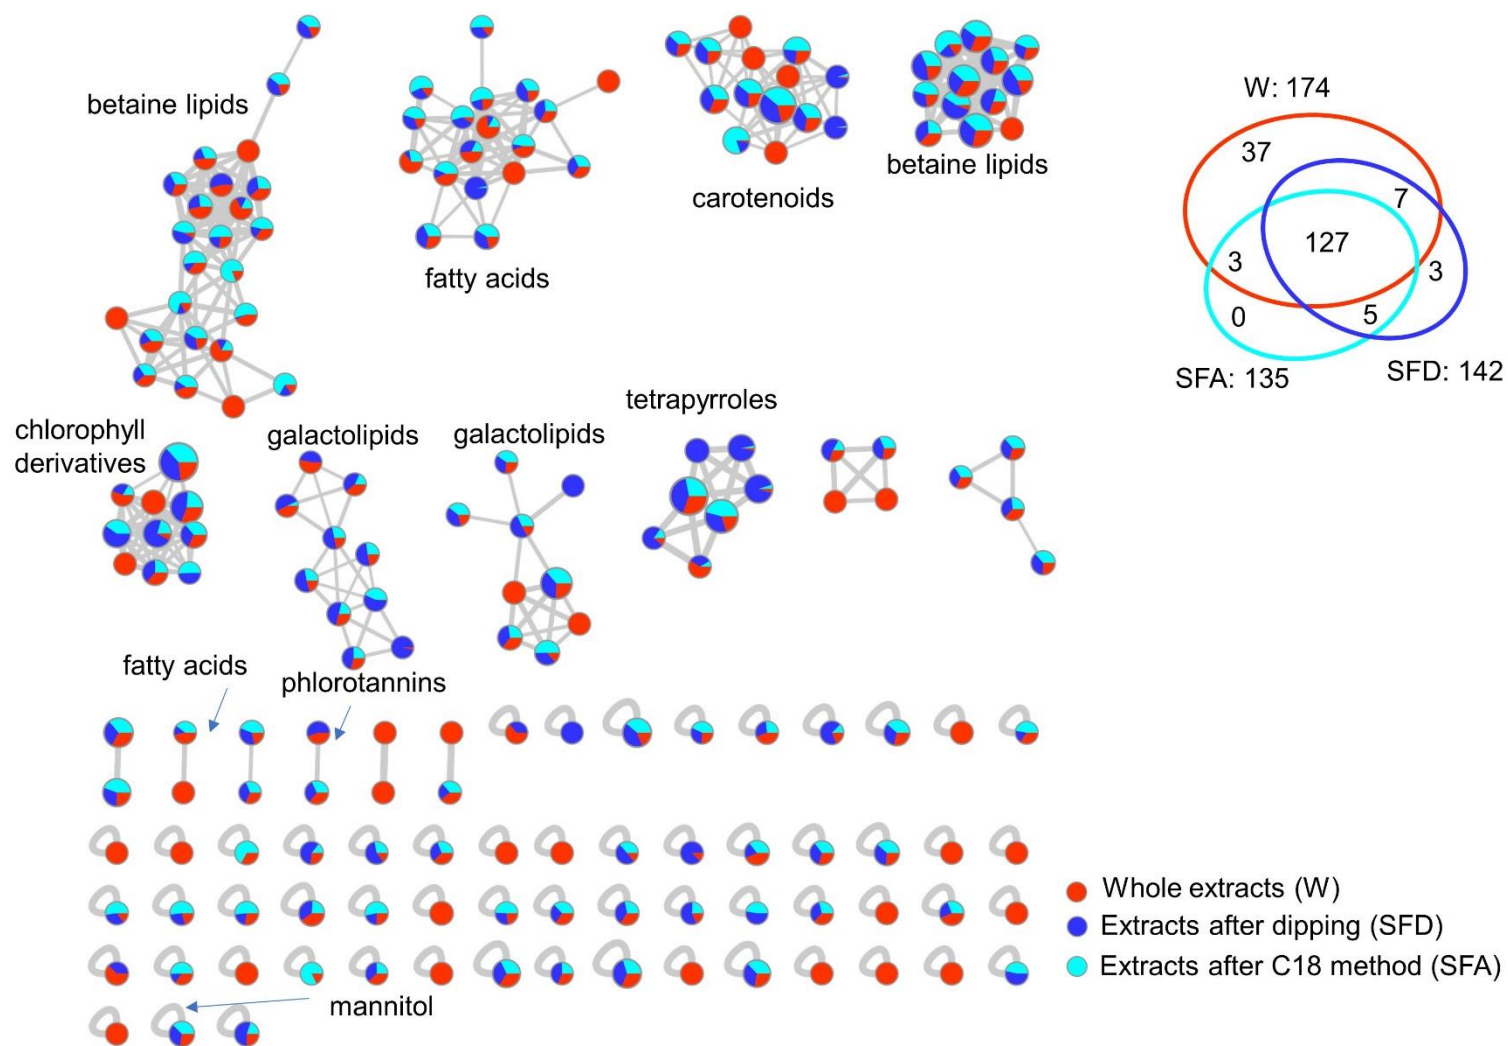

**Figure S12.** MN generated from UPLC-(+)-ESI-MS/MS data of all surface-free and whole extracts. Node sizes are modulated according to the sum of intensities of the ions in all extracts while the colors in the pie chart of each node represents the relative quantity of the ion from whole extracts (red), surface-free after dipping (blue) and surface-free after C18 adsorption (light blue)

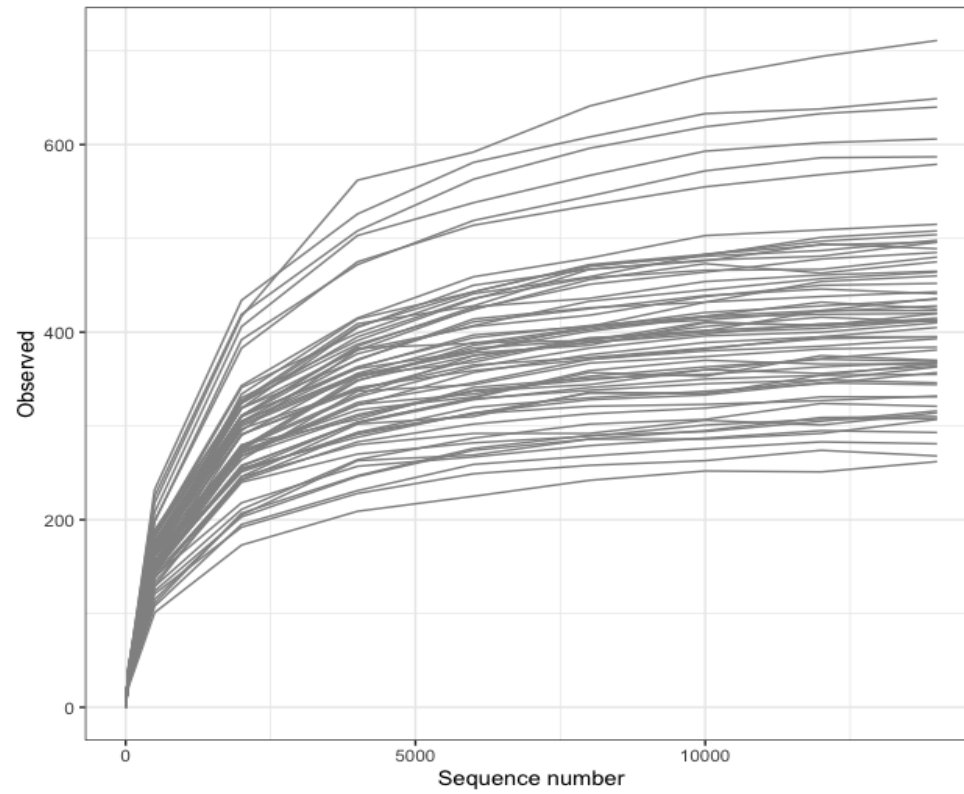

**Figure S13.** Rarefaction curves of bacterial V3/V4 region amplicon sequences from all 66 samples.

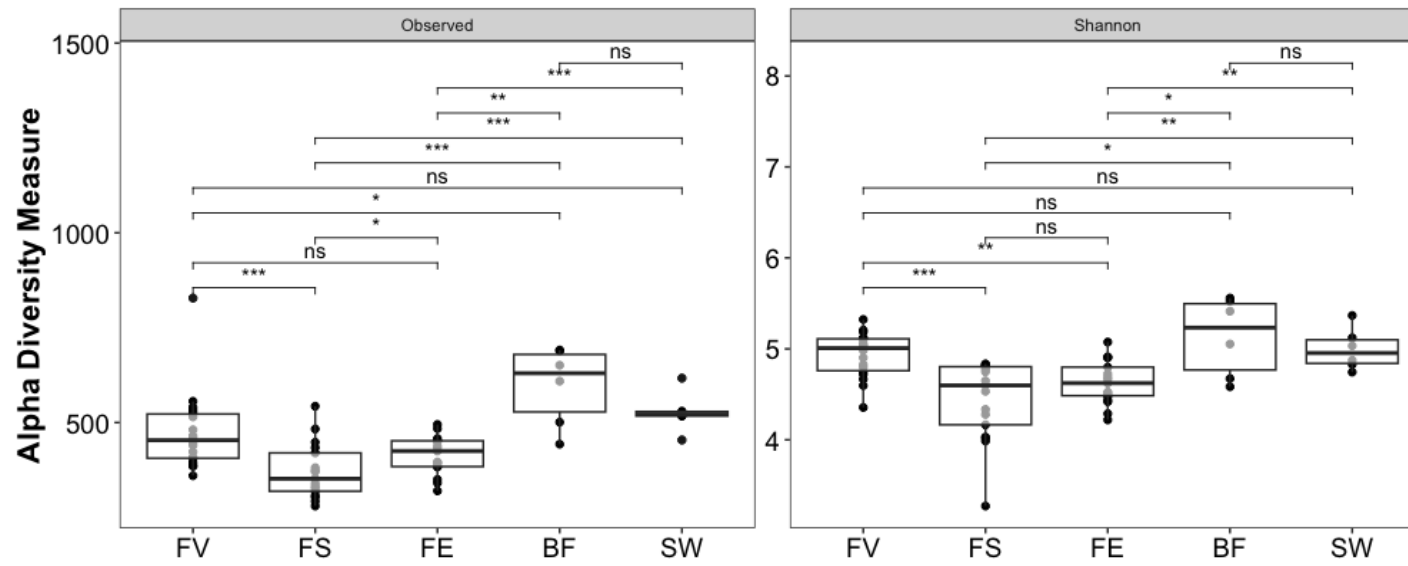

**Figure S14.** Alpha diversity (ASV-Observed vs. Shannon) of bacterial epiphytic community with regard to sample source. FV: *F. vesiculosus*, FS: *F. serratus*, FE: *F. distichus* subsp. *evanescens*, BF: biofilm on stone, SW: seawater. Significance levels: >0.0001: \*\*\*, >0.001: \*\*, 0.01: \*, >0.05: ns)



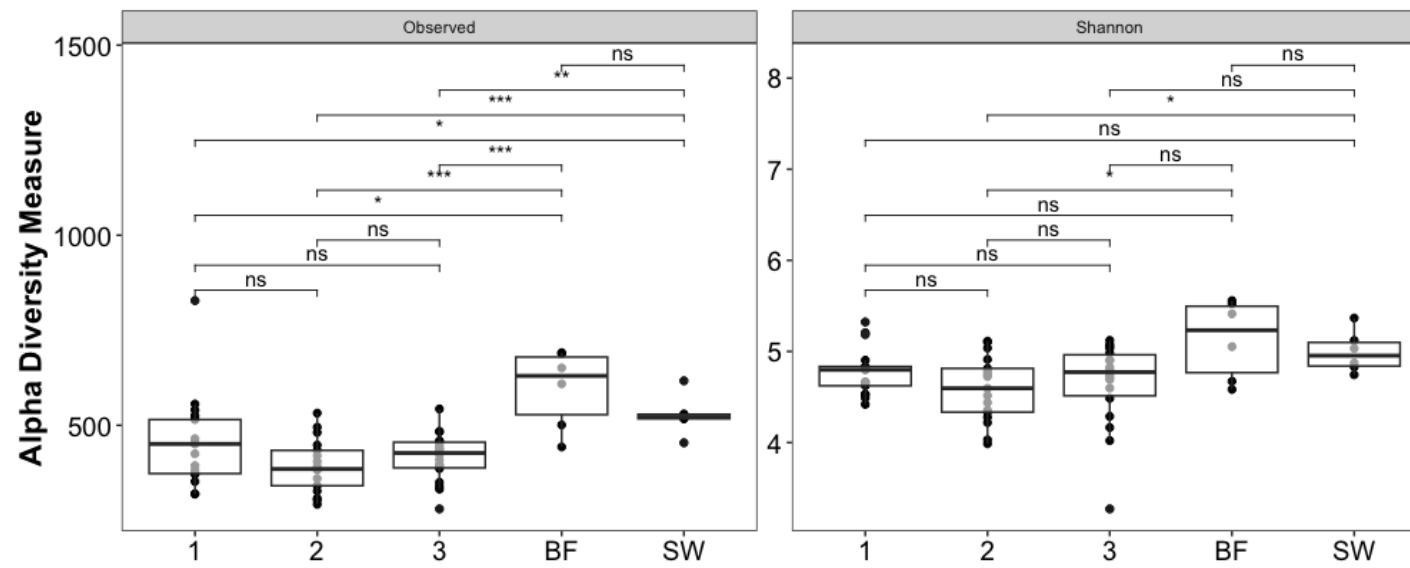

**Figure S15.** Alpha diversity (ASV-Observed vs. Shannon) of bacterial epiphytic community with regard to individual. 1: individual 1, 2: individual 2, 3: individual 3, BF: biofilm on stone, SW: seawater. Significance levels: >0.0001: \*\*\*, >0.001: \*\*, 0.01: \*, >0.05: ns)

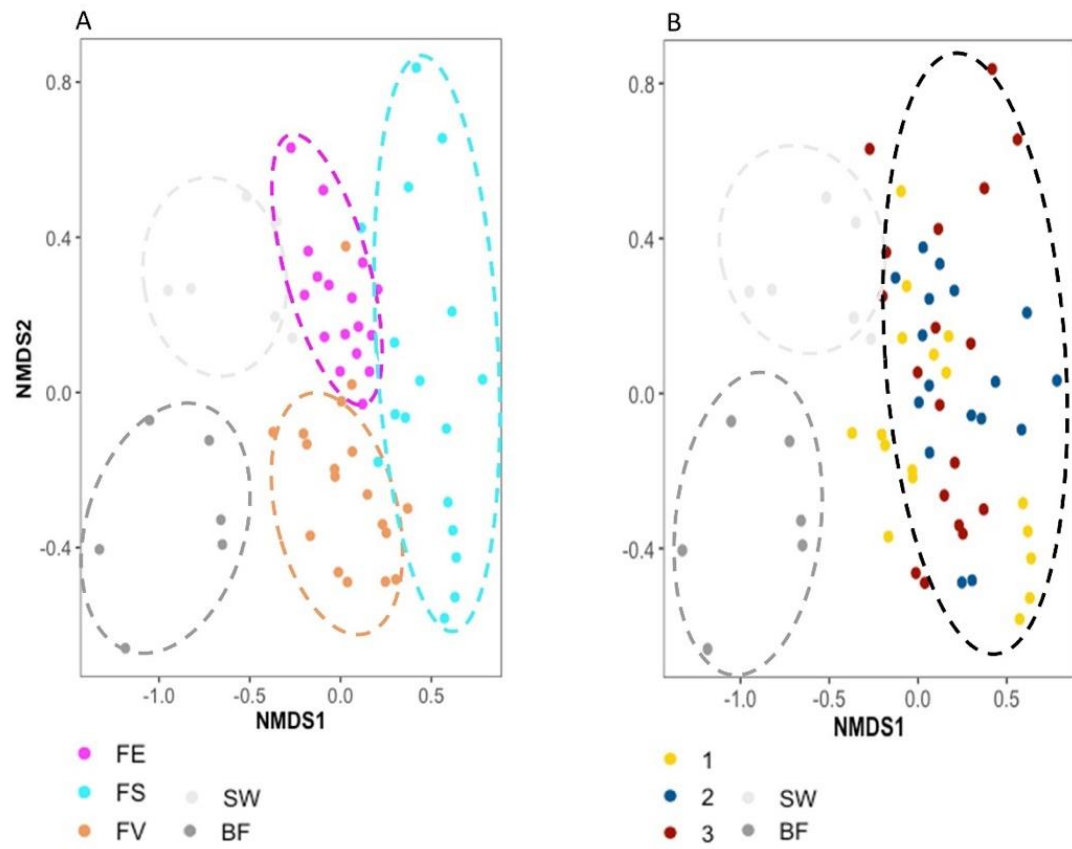

**Figure S16.** Beta diversity analysis of bacterial amplicon data based on Bray-Curtis distance calculation visualized by NMDS plots (A) according to sample origin (B) according to individual. FV: *Fucus vesiculosus*, FS: *F. serratus*, FE: *F. distichus* subsp. *evanescens*, BF: biofilm on stone, SW: seawater.

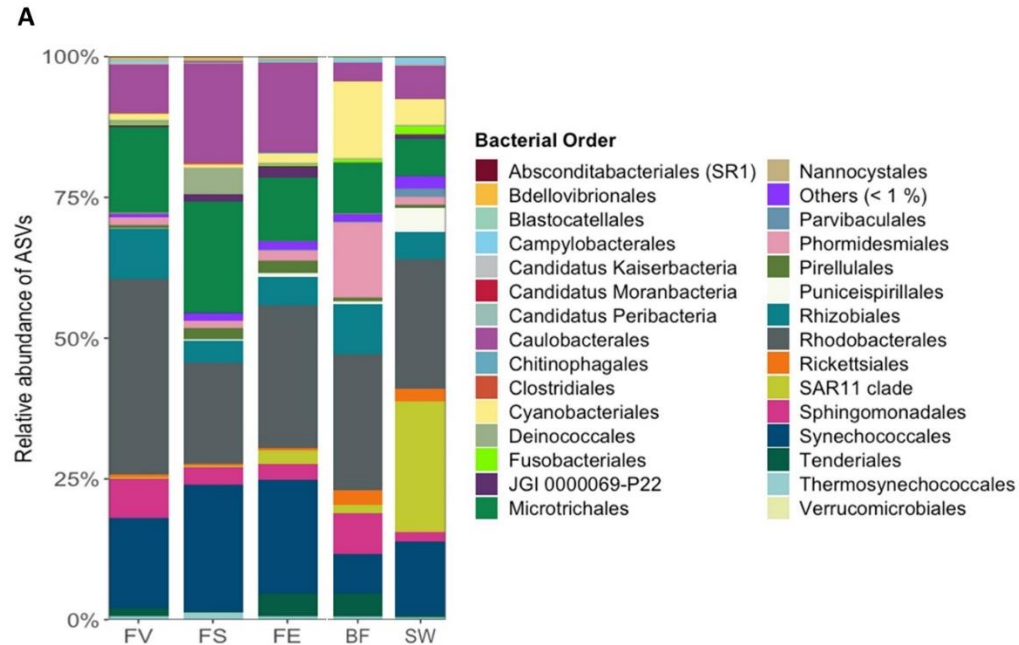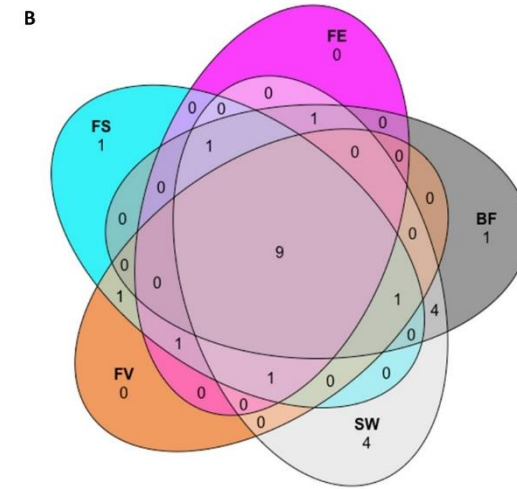

**Figure S17.** (A) Bacterial orders associated with surfaces of *Fucus* spp., and stone biofilm and seawater reference samples. Others (<1%) represents several orders with less than 1% relative abundance. (B) Venn diagram displaying bacterial orders with regard to different sample types FV: *Fucus vesiculosus*, FS: *F. serratus*, FE: *F. distichus* subsp. *evanescens*, BF: biofilm on stone, SW: seawater.

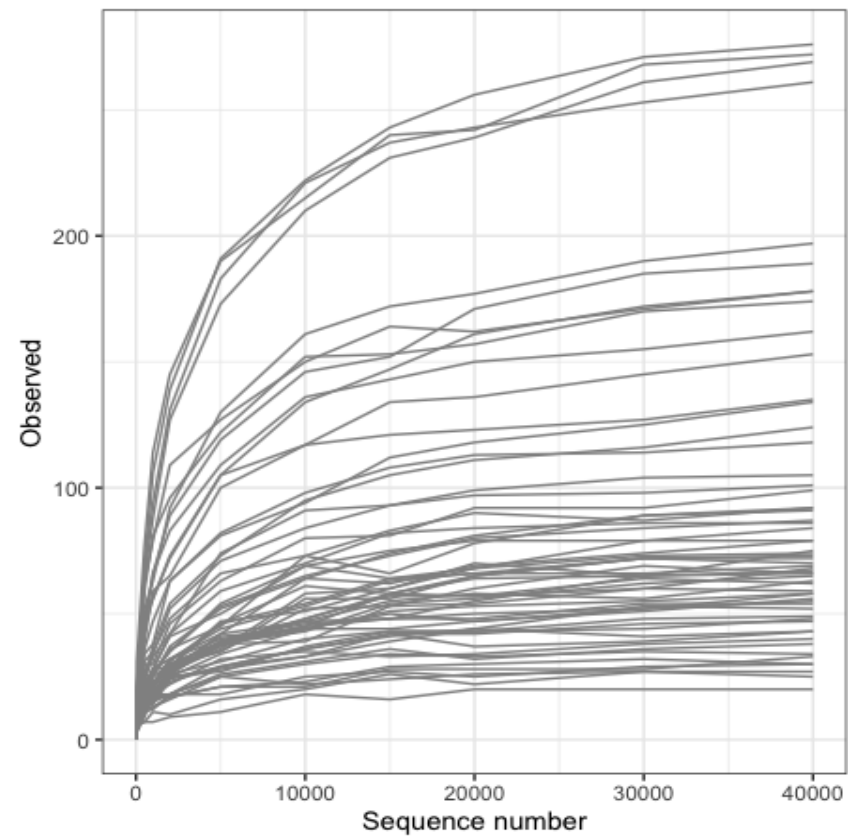

**Figure S18.** Rarefaction curves of eukaryotic ITS region amplicon sequences from all 60 samples.

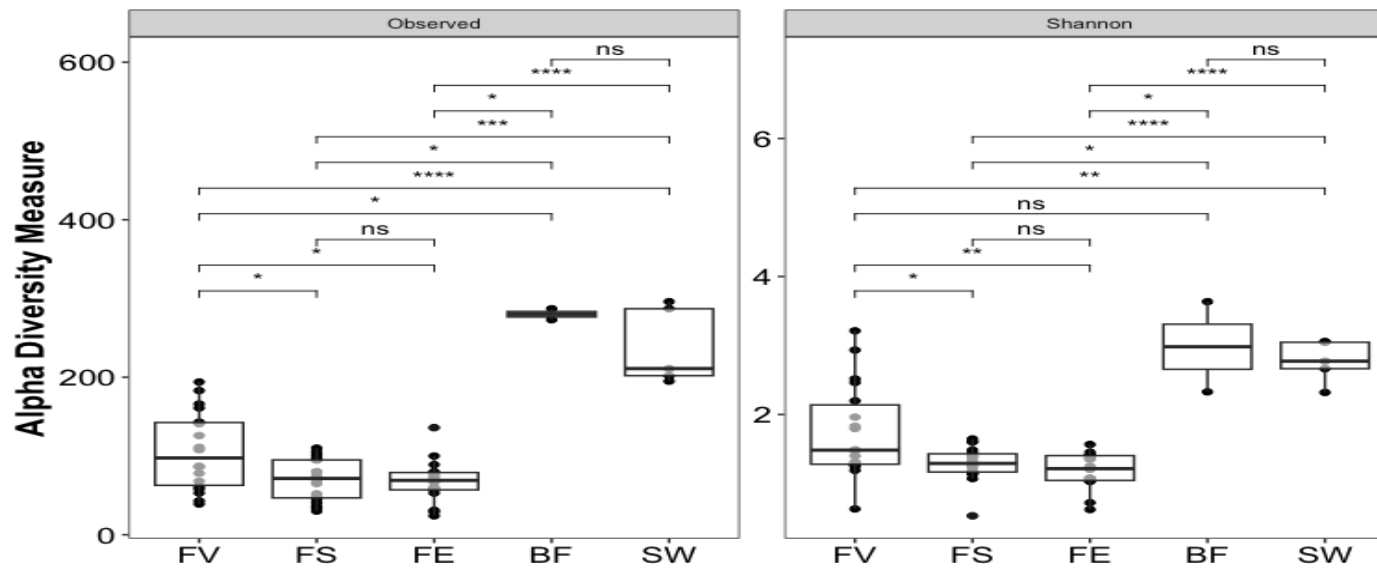

**Figure S19.** Alpha diversity (ASV-Observed vs. Shannon) of eukaryotic epiphytic community based on ITS fragment sequences with regard to sample source. FV: *F. vesiculosus*, FS: *F. serratus*, FE: *F. distichus* subsp. *evanescens*, BF: biofilm on stone, SW: seawater. Significance levels: >0:\*\*\*\*, >0.0001: \*\*\*, >0.001: \*\*, 0.01: \*, >0.05: ns)

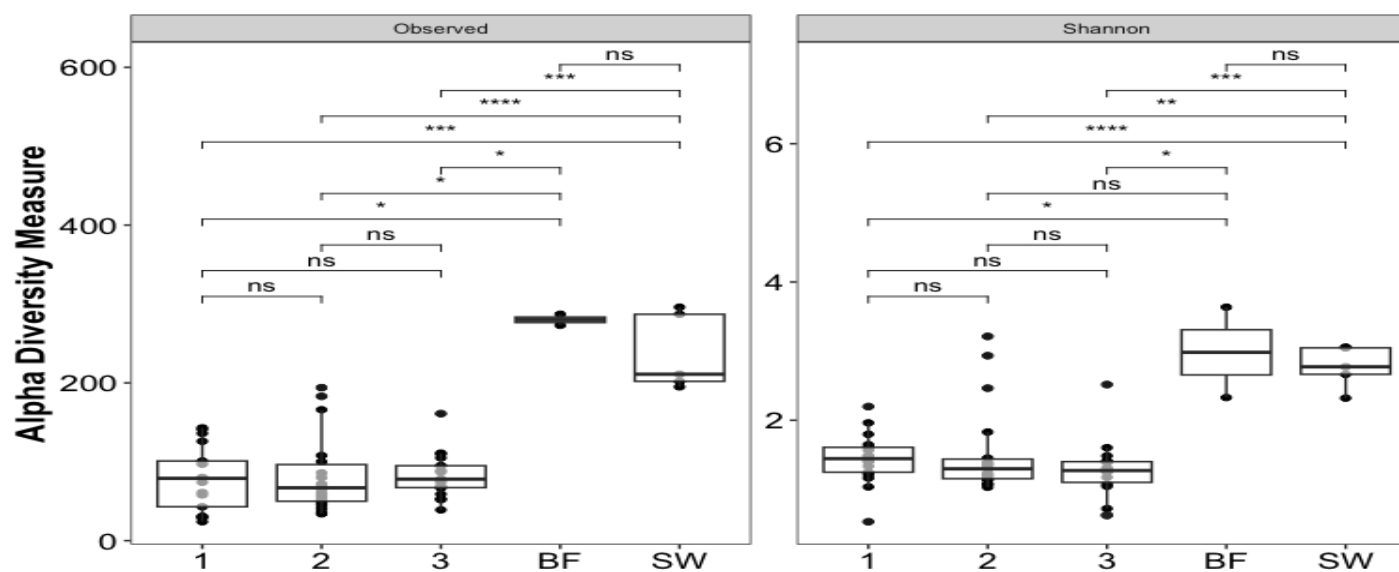

**Figure S20.** Alpha diversity (ASV-Observed vs. Shannon) of eukaryotic epiphytic community based on ITS fragment sequences with regard to individual. 1: individual 1, 2: individual 2, 3: individual 3, BF: biofilm on stone, SW: seawater. Significance levels: >0:\*\*\*\*, >0.0001: \*\*\*, >0.001: \*\*, 0.01: \*, >0.05: ns)

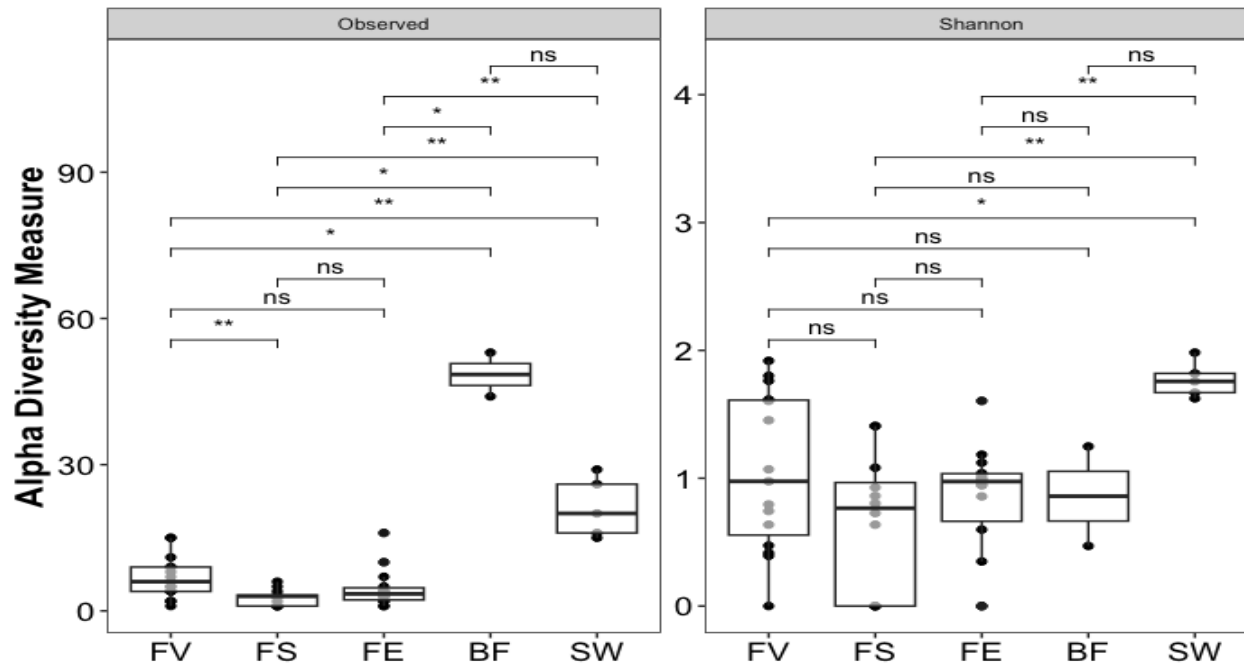

**Figure S21.** Alpha diversity (ASV-Observed vs. Shannon) of fungal epiphytic community based on ITS fragment sequences with regard to sample source. FV: *F. vesiculosus*, FS: *F. serratus*, FE: *F. distichus* subsp. *evanescens*, BF: biofilm on stone, SW: seawater. Significance levels: >0.\*\*\*, >0.0001: \*\*\*, >0.001: \*\*, 0.01: \*, >0.05: ns)

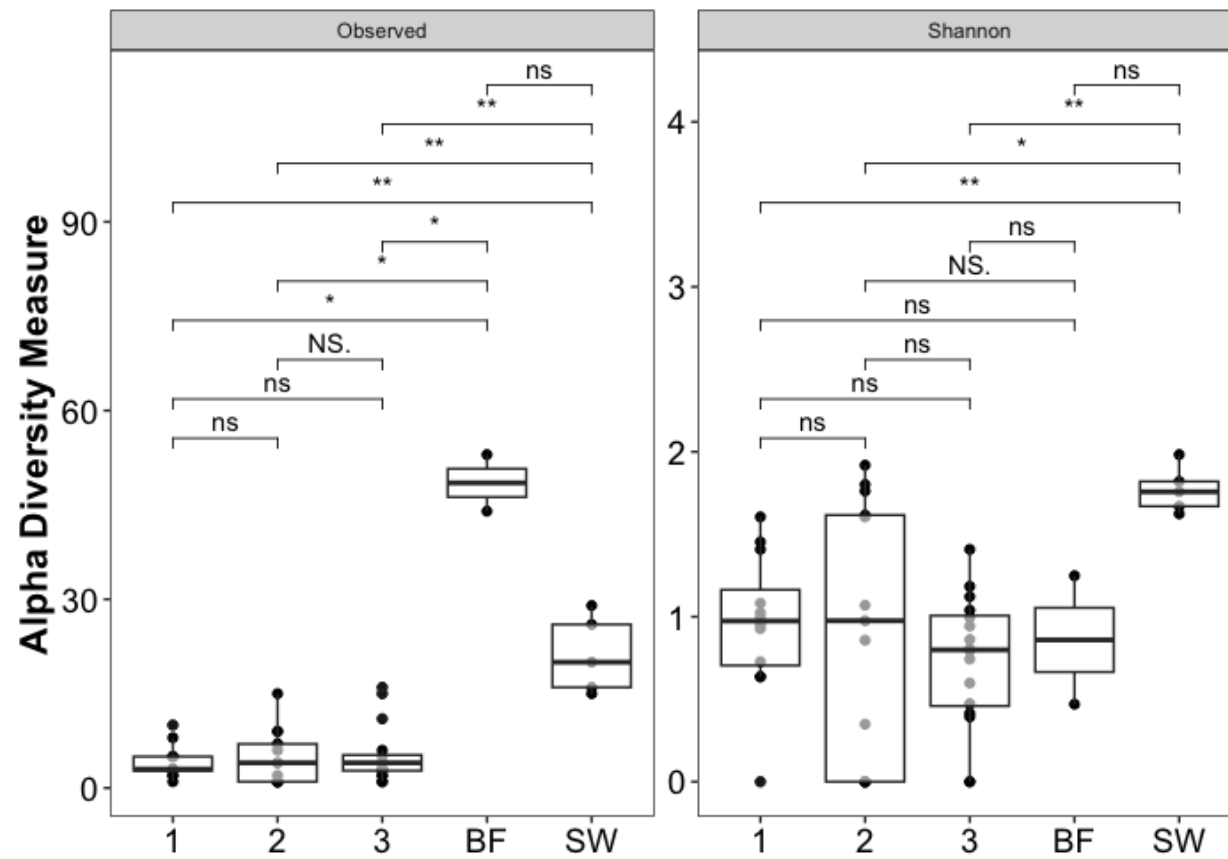

**Figure S22.** Alpha diversity (ASV-Observed vs. Shannon) of fungal epiphytic community based on ITS fragment sequences with regard to individual. 1: individual 1, 2: individual 2, 3: individual 3, BF: biofilm on stone, SW: seawater. Significance levels: >0:\*\*\*, >0.0001: \*\*\*, >0.001: \*\*, 0.01: \*, >0.05: ns)



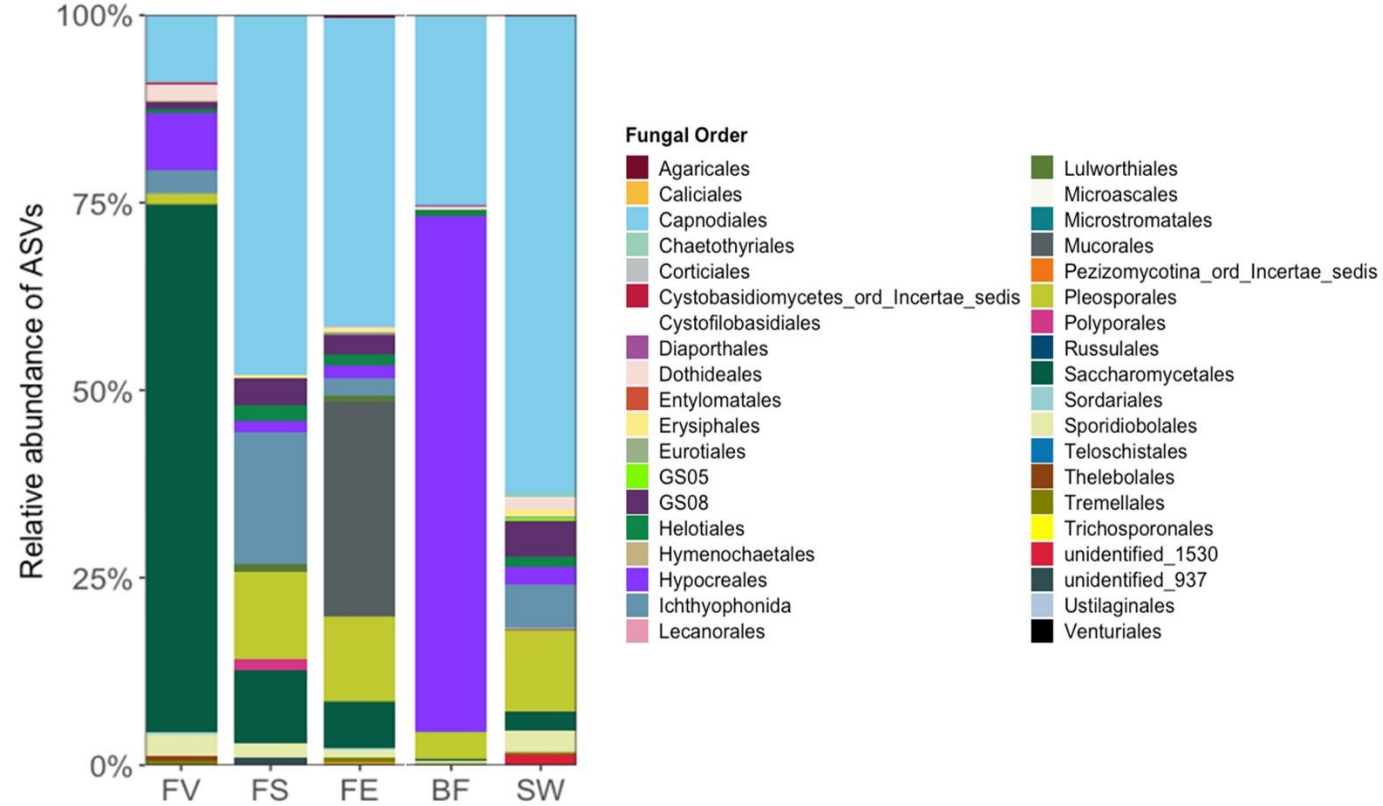

**Figure S23.** Fungal orders associated to surfaces of *Fucus* spp., and stone biofilm (BF) and seawater (SW) reference samples. FV: *Fucus vesiculosus*, FS: *F. serratus*, FE: *F. distichus* subsp. *evanescens*.

Table S2

Relative abundances of bacterial genera (> 1%) associated to surfaces of *Fucus* spp., seawater and stone biofilm based on amplicon sequencing of the V3/V4 region of the 16S rRNA gene.

| <i>F. vesiculosus</i> (FV) |                          |                  |             | <i>F. serratus</i> (FS) |                          |                  |             | <i>F. distichus</i> subsp. <i>evanescens</i> (FE) |                          |                  |             |
|----------------------------|--------------------------|------------------|-------------|-------------------------|--------------------------|------------------|-------------|---------------------------------------------------|--------------------------|------------------|-------------|
| ASV No.                    | Genus                    | Phylum           | % Abundance | ASV No.                 | Genus                    | Phylum           | % Abundance | ASV No.                                           | Genus                    | Phylum           | % Abundance |
| ASV1                       | Schizothrix LEGE 07164   | Cyanobacteria    | 24.41       | ASV1                    | Schizothrix LEGE 07164   | Cyanobacteria    | 29.61       | ASV1                                              | Schizothrix LEGE 07164   | Cyanobacteria    | 26.02       |
| ASV11                      | Sva0996 marine group     | Actinobacteriota | 11.78       | ASV11                   | Sva0996 marine group     | Actinobacteriota | 13.97       | ASV4                                              | Robiginitomaculum        | Proteobacteria   | 12.84       |
| ASV12                      | Ilumatobacter            | Actinobacteriota | 9.85        | ASV17                   | Litorimonas              | Proteobacteria   | 13.65       | ASV10                                             | Yoonia-Loktanella        | Proteobacteria   | 8.96        |
| ASV10                      | Yoonia-Loktanella        | Proteobacteria   | 8.68        | ASV12                   | Ilumatobacter            | Actinobacteriota | 8.31        | ASV11                                             | Sva0996 marine group     | Actinobacteriota | 7.20        |
| ASV20                      | Octadecabacter           | Proteobacteria   | 6.85        | ASV24                   | Truepera                 | Deinococcota     | 6.24        | ASV12                                             | Ilumatobacter            | Actinobacteriota | 7.12        |
| ASV17                      | Litorimonas              | Proteobacteria   | 5.08        | ASV4                    | Robiginitomaculum        | Proteobacteria   | 3.62        | ASV13                                             | Candidatus Tenderia      | Proteobacteria   | 5.25        |
| ASV14                      | Silicimonas              | Proteobacteria   | 5.00        | ASV21                   | Fretibacter              | Proteobacteria   | 3.50        | ASV20                                             | Octadecabacter           | Proteobacteria   | 3.96        |
| ASV51                      | Erythrobacter            | Proteobacteria   | 4.08        | ASV10                   | Yoonia-Loktanella        | Proteobacteria   | 2.99        | ASV17                                             | Litorimonas              | Proteobacteria   | 3.86        |
| ASV4                       | Robiginitomaculum        | Proteobacteria   | 2.74        | ASV68                   | Blastopirellula          | Planctomycetota  | 2.67        | ASV68                                             | Blastopirellula          | Planctomycetota  | 2.90        |
| ASV39                      | Filomicrobium            | Proteobacteria   | 2.48        | ASV20                   | Octadecabacter           | Proteobacteria   | 2.36        | ASV21                                             | Fretibacter              | Proteobacteria   | 2.69        |
| ASV13                      | Candidatus Tenderia      | Proteobacteria   | 2.04        | ASV88                   | Acaryochloris MBIC11017  | Cyanobacteria    | 1.71        | ASV19                                             | Clade Ia                 | Proteobacteria   | 2.03        |
| ASV73                      | Altererythrobacter       | Proteobacteria   | 1.54        | ASV14                   | Silicimonas              | Proteobacteria   | 1.59        | ASV14                                             | Silicimonas              | Proteobacteria   | 1.75        |
| ASV21                      | Fretibacter              | Proteobacteria   | 1.35        | ASV61                   | Phormidesmis ANT.LACV5.1 | Cyanobacteria    | 1.39        | ASV61                                             | Phormidesmis ANT.LACV5.1 | Cyanobacteria    | 1.64        |
| ASV61                      | Phormidesmis ANT.LACV5.1 | Cyanobacteria    | 1.24        | ASV39                   | Filomicrobium            | Proteobacteria   | 1.05        | ASV29                                             | Planktomarina            | Proteobacteria   | 1.31        |
| ASV24                      | Truepera                 | Deinococcota     | 1.09        |                         |                          |                  |             |                                                   |                          |                  |             |
| seawater (SW)              |                          |                  |             | stone biofilm (BF)      |                          |                  |             |                                                   |                          |                  |             |
| ASV No.                    | Genus                    | Phylum           | % Abundance | ASV No.                 | Genus                    | Phylum           | % Abundance |                                                   |                          |                  |             |
| ASV19                      | Clade Ia                 | Proteobacteria   | 22.46       | ASV61                   | Phormidesmis ANT.LACV5.1 | Cyanobacteria    | 12.76       |                                                   |                          |                  |             |
| ASV1                       | Schizothrix LEGE 07164   | Cyanobacteria    | 14.56       | ASV49                   | Rivularia PCC-7116       | Cyanobacteria    | 11.30       |                                                   |                          |                  |             |
| ASV29                      | Planktomarina            | Proteobacteria   | 10.17       | ASV12                   | Ilumatobacter            | Actinobacteriota | 9.39        |                                                   |                          |                  |             |
| ASV79                      | Cand. Puniceispirillum   | Proteobacteria   | 6.02        | ASV1                    | Schizothrix LEGE 07164   | Cyanobacteria    | 8.85        |                                                   |                          |                  |             |
| ASV12                      | Ilumatobacter            | Actinobacteriota | 4.89        | ASV13                   | Cand. Tenderia           | Proteobacteria   | 5.80        |                                                   |                          |                  |             |
| ASV11                      | Sva0996 marine group     | Actinobacteriota | 4.13        | ASV10                   | Yoonia-Loktanella        | Proteobacteria   | 5.07        |                                                   |                          |                  |             |
| ASV4                       | Robiginitomaculum        | Proteobacteria   | 4.09        | ASV76                   | Sphingorhabdus           | Proteobacteria   | 4.66        |                                                   |                          |                  |             |
| ASV130                     | Aphanizomenon NIES81     | Cyanobacteria    | 3.44        | ASV116                  | Pleurocapsa PCC-7319     | Cyanobacteria    | 4.37        |                                                   |                          |                  |             |
| ASV158                     | Cyanobium PCC-6307       | Cyanobacteria    | 3.42        | ASV93                   | Phormidium MBIC10003     | Cyanobacteria    | 4.05        |                                                   |                          |                  |             |
| ASV10                      | Yoonia-Loktanella        | Proteobacteria   | 3.38        | ASV11                   | Sva0996 marine group     | Actinobacteriota | 3.06        |                                                   |                          |                  |             |
| ASV171                     | Propionigenium           | Fusobacteriota   | 2.09        | ASV51                   | Erythrobacter            | Proteobacteria   | 1.89        |                                                   |                          |                  |             |
| ASV17                      | Litorimonas              | Proteobacteria   | 1.88        | ASV98                   | Ahrensia                 | Proteobacteria   | 1.61        |                                                   |                          |                  |             |
| ASV20                      | Octadecabacter           | Proteobacteria   | 1.73        | ASV4                    | Robiginitomaculum        | Proteobacteria   | 1.54        |                                                   |                          |                  |             |
| ASV61                      | Phormidesmis ANT.LACV5.1 | Cyanobacteria    | 1.52        | ASV14                   | Silicimonas              | Proteobacteria   | 1.34        |                                                   |                          |                  |             |
| ASV14                      | Silicimonas              | Proteobacteria   | 1.28        | ASV19                   | Clade Ia                 | Proteobacteria   | 1.25        |                                                   |                          |                  |             |
|                            |                          |                  |             | ASV158                  | Cyanobium PCC-6307       | Cyanobacteria    | 1.22        |                                                   |                          |                  |             |
|                            |                          |                  |             | ASV29                   | Planktomarina            | Proteobacteria   | 1.12        |                                                   |                          |                  |             |
|                            |                          |                  |             | ASV20                   | Octadecabacter           | Proteobacteria   | 1.10        |                                                   |                          |                  |             |

Table S3

Bacterial beta diversity statistics based on Bray-Curtis dissimilarity, left: PERMANOVA results, right: pairwise permutation test for homogeneity of multivariate dispersions

| PERMANOVA      |    | Signif. codes: 0 '***' 0.001 '**' 0.01 '*' 0.05 '.' 0.1 ' ' 1 |         |        |        |                   |                      |                             |                 | pairwise permutation for homogeneity of multivariate dispersion |         |                |                 |      |          |        |                   |                      |                             |                              |
|----------------|----|---------------------------------------------------------------|---------|--------|--------|-------------------|----------------------|-----------------------------|-----------------|-----------------------------------------------------------------|---------|----------------|-----------------|------|----------|--------|-------------------|----------------------|-----------------------------|------------------------------|
|                | Df | Sum Squares                                                   | R2      | F      | Pr(>F) | Signifi-<br>cance | Resi-<br>duals<br>df | Residuals<br>Sum<br>Squares | Residuals<br>R2 |                                                                 | Df      | Sum<br>Squares | Mean<br>Squares | F    | N permut | Pr(>F) | Signifi-<br>cance | Resi-<br>duals<br>df | Residuals<br>sum<br>squares | Residuals<br>mean<br>squares |
| full dataset   |    |                                                               |         |        |        |                   |                      |                             |                 | full dataset                                                    |         |                |                 |      |          |        |                   |                      |                             |                              |
| origin         | 4  | 4.8181                                                        | 0.39588 | 9.6655 | 0.001  | ***               | 59                   | 7.3572                      | 0.60412         | 4                                                               | 0.13976 | 0.034941       | 8.1559          | 1000 | 0.000999 | ***    | 59                | 0.25276              | 0.004284                    |                              |
| individual no. | 4  | 3.1344                                                        | 0.25753 | 5.1162 | 0.001  | ***               | 59                   | 9.0364                      | 0.74247         | 4                                                               | 0.13753 | 0.034383       | 7.4047          | 1000 | 0.000999 | ***    | 59                | 0.27396              | 0.004643                    |                              |
| FV             |    |                                                               |         |        |        |                   |                      |                             |                 | FV                                                              |         |                |                 |      |          |        |                   |                      |                             |                              |
| individual no. | 2  | 0.50452                                                       | 0.26094 | 2.6481 | 0.015  | *                 | 15                   | 1.42895                     | 0.73906         | 2                                                               | 0.00199 | 0.000966       | 0.2325          | 1000 | 0.7972   | ns     | 15                | 0.064251             | 0.004283                    |                              |
| tissue age     | 1  | 0.58970                                                       | 0.30499 | 7.0214 | 0.001  | ***               | 16                   | 1.3438                      | 0.69501         | 1                                                               | 0.00586 | 0.005862       | 1.361           | 1000 | 0.2677   | ns     | 16                | 0.068909             | 0.004307                    |                              |
| FS             |    |                                                               |         |        |        |                   |                      |                             |                 | FS                                                              |         |                |                 |      |          |        |                   |                      |                             |                              |
| individual no. | 2  | 1.16040                                                       | 0.42611 | 5.1974 | 0.001  | ***               | 14                   | 1.5629                      | 0.57389         | 2                                                               | 0.03316 | 0.01658        | 2.1023          | 1000 | 0.1638   | ns     | 14                | 0.110414             | 0.007887                    |                              |
| FE             |    |                                                               |         |        |        |                   |                      |                             |                 | FE                                                              |         |                |                 |      |          |        |                   |                      |                             |                              |
| individual no. | 2  | 0.39425                                                       | 0.23931 | 2.2022 | 0.013  | *                 | 14                   | 1.25319                     | 0.76069         | 2                                                               | 0.00709 | 0.003544       | 1.0939          | 1000 | 0.3716   | ns     | 14                | 0.045354             | 0.00324                     |                              |

**Table S4**

Relative abundances of eukaryote genera (> 1%) associated to surfaces of *Fucus* spp., seawater and stone biofilm based on amplicon sequencing of the ITS fragment.

| <i>F. vesiculosus</i> (FV) |                    |                   |             | <i>F. serratus</i> (FS) |                    |                   |             | <i>F. distichus</i> subsp. <i>evanescens</i> (FE) |                    |                   |             |
|----------------------------|--------------------|-------------------|-------------|-------------------------|--------------------|-------------------|-------------|---------------------------------------------------|--------------------|-------------------|-------------|
| ASV No.                    | Genus              | Phylum            | % Abundance | ASV No.                 | Genus              | Phylum            | % Abundance | ASV No.                                           | Genus              | Phylum            | % Abundance |
| ASV52                      | Zoothamnium        | Ciliophora        | 39.26       | ASV45                   | unidentified_91524 | Ciliophora        | 33.17       | ASV28                                             | Sarsia             | Cnidaria          | 27.22       |
| ASV45                      | unidentified_91524 | Ciliophora        | 28.84       | ASV87                   | Ulva               | Chlorophyta       | 17.18       | ASV19                                             | unidentified_12446 | Ciliophora        | 25.46       |
| ASV64                      | Candida            | Ascomycota        | 16.26       | ASV19                   | unidentified_12446 | Ciliophora        | 11.57       | ASV221                                            | Mucor              | Mucoromycota      | 11.60       |
| ASV106                     | Pseudovorticella   | Ciliophora        | 3.83        | ASV106                  | Pseudovorticella   | Ciliophora        | 9.69        | ASV87                                             | Ulva               | Chlorophyta       | 8.74        |
| ASV178                     | unidentified_15    | unidentified      | 2.32        | ASV28                   | Sarsia             | Cnidaria          | 7.14        | ASV45                                             | unidentified_91524 | Ciliophora        | 6.17        |
| ASV210                     | Myoschiston        | Ciliophora        | 1.92        | ASV280                  | Uronema_91786      | Ciliophora        | 5.94        | ASV108                                            | unidentified_5383  | unidentified_6967 | 3.81        |
| ASV10                      | Haptocillium       | Ascomycota        | 1.82        | ASV108                  | unidentified_5383  | unidentified_6967 | 4.17        | ASV97                                             | Alternaria         | Ascomycota        | 2.64        |
| ASV216                     | unidentified_4835  | unidentified_6334 | 1.62        | ASV366                  | Haliclystus        | Cnidaria          | 2.07        | ASV127                                            | Pseudendoconium    | Chlorophyta       | 2.22        |
|                            |                    |                   |             | ASV52                   | Zoothamnium        | Ciliophora        | 1.25        | ASV106                                            | Pseudovorticella   | Ciliophora        | 2.08        |
|                            |                    |                   |             |                         |                    |                   |             | ASV166                                            | unidentified_33279 | Chlorophyta       | 1.23        |
|                            |                    |                   |             |                         |                    |                   |             | ASV244                                            | unidentified_2488  | Rozellomycota     | 1.02        |
| seawater (SW)              |                    |                   |             | stone biofilm (BF)      |                    |                   |             |                                                   |                    |                   |             |
| ASV No.                    | Genus              | Phylum            | % Abundance | ASV No.                 | Genus              | Phylum            | % Abundance |                                                   |                    |                   |             |
| ASV28                      | Sarsia             | Cnidaria          | 39.62       | ASV10                   | Haptocillium       | Ascomycota        | 76.14       |                                                   |                    |                   |             |
| ASV19                      | unidentified_12446 | Ciliophora        | 35.05       | ASV87                   | Ulva               | Chlorophyta       | 5.84        |                                                   |                    |                   |             |
| ASV108                     | unidentified_5383  | unidentified_6967 | 5.81        | ASV75                   | Cladosporium       | Ascomycota        | 3.94        |                                                   |                    |                   |             |
| ASV45                      | unidentified_91524 | Ciliophora        | 4.89        | ASV127                  | Pseudendoconium    | Chlorophyta       | 3.47        |                                                   |                    |                   |             |
| ASV87                      | Ulva               | Chlorophyta       | 3.30        | ASV97                   | Alternaria         | Ascomycota        | 2.80        |                                                   |                    |                   |             |
| ASV106                     | Pseudovorticella   | Ciliophora        | 1.94        | ASV45                   | unidentified_91524 | Ciliophora        | 2.34        |                                                   |                    |                   |             |
|                            |                    |                   |             | ASV166                  | unidentified_33279 | Chlorophyta       | 1.17        |                                                   |                    |                   |             |
|                            |                    |                   |             |                         |                    |                   |             |                                                   |                    |                   |             |
|                            |                    |                   |             |                         |                    |                   |             |                                                   |                    |                   |             |
|                            |                    |                   |             |                         |                    |                   |             |                                                   |                    |                   |             |
|                            |                    |                   |             |                         |                    |                   |             |                                                   |                    |                   |             |
|                            |                    |                   |             |                         |                    |                   |             |                                                   |                    |                   |             |
|                            |                    |                   |             |                         |                    |                   |             |                                                   |                    |                   |             |
|                            |                    |                   |             |                         |                    |                   |             |                                                   |                    |                   |             |
|                            |                    |                   |             |                         |                    |                   |             |                                                   |                    |                   |             |

Table S5

ITS beta diversity statistics based on Bray-Curtis dissimilarity, left: PERMANOVA results, right: pairwise permutation test for homogeneity of multivariate dispersions

| PERMANOVA      |    | Signif. codes: 0 '***' 0.001 '**' 0.01 '*' 0.05 '.' 0.1 ' ' 1 |         |        |        |                   |                      |                             |                 | pairwise permutation for homogeneity of multivariate dispersion |         |                |                 |      |          |        |                   |                      |                             |                              |
|----------------|----|---------------------------------------------------------------|---------|--------|--------|-------------------|----------------------|-----------------------------|-----------------|-----------------------------------------------------------------|---------|----------------|-----------------|------|----------|--------|-------------------|----------------------|-----------------------------|------------------------------|
|                | Df | Sum Squares                                                   | R2      | F      | Pr(>F) | Signifi-<br>cance | Resi-<br>duals<br>df | Residuals<br>Sum<br>Squares | Residuals<br>R2 |                                                                 | Df      | Sum<br>Squares | Mean<br>Squares | F    | N permut | Pr(>F) | Signifi-<br>cance | Resi-<br>duals<br>df | Residuals<br>sum<br>squares | Residuals<br>mean<br>squares |
| full dataset   |    |                                                               |         |        |        |                   |                      |                             |                 | full dataset                                                    |         |                |                 |      |          |        |                   |                      |                             |                              |
| origin         | 4  | 4.0572                                                        | 0.29338 | 5.7089 | 0.001  | ***               | 55                   | 9.7718                      | 0.70662         | 4                                                               | 0.13976 | 0.034941       | 8.1559          | 1000 | 0.000999 | ***    | 59                | 0.25276              | 0.004284                    |                              |
| individual no. | 4  | 3.7628                                                        | 0.2721  | 5.1398 | 0.001  | ***               | 55                   | 10.0662                     | 0.7279          | 4                                                               | 0.13753 | 0.034383       | 7.4047          | 1000 | 0.000999 | ***    | 59                | 0.27396              | 0.004643                    |                              |
| FV             |    |                                                               |         |        |        |                   |                      |                             |                 | FV                                                              |         |                |                 |      |          |        |                   |                      |                             |                              |
| individual no. | 2  | 0.7918                                                        | 0.2223  | 2.1438 | 0.054  | .                 | 15                   | 2.77                        | 0.7777          | 2                                                               | 0.00199 | 0.000966       | 0.2325          | 1000 | 0.7972   | ns     | 15                | 0.064251             | 0.004283                    |                              |
| FS             |    |                                                               |         |        |        |                   |                      |                             |                 | FS                                                              |         |                |                 |      |          |        |                   |                      |                             |                              |
| individual no. | 2  | 0.37763                                                       | 0.18583 | 1.7118 | 0.076  | .                 | 15                   | 1.65453                     | 0.81417         | 2                                                               | 0.03316 | 0.01658        | 2.1023          | 1000 | 0.1638   | ns     | 14                | 0.110414             | 0.007887                    |                              |
| FE             |    |                                                               |         |        |        |                   |                      |                             |                 | FE                                                              |         |                |                 |      |          |        |                   |                      |                             |                              |
| individual no. | 2  | 0.27035                                                       | 0.09155 | 0.7054 | 0.493  | ns                | 14                   | 2.68281                     | 0.90845         | 2                                                               | 0.00709 | 0.003544       | 1.0939          | 1000 | 0.3716   | ns     | 14                | 0.045354             | 0.00324                     |                              |

Relative abundances of fungal genera (>1%) associated to the surfaces of *Fucus* spp., seawater and stone biofilm based on amplicon sequencing of the ITS fragment.

| <i>F. vesiculosus</i> (FV) |                   |                                  |             | <i>F. serratus</i> (FS) |                    |                                  |             | <i>F. distichus</i> subsp. <i>evanescens</i> (FE) |                    |                                  |             |
|----------------------------|-------------------|----------------------------------|-------------|-------------------------|--------------------|----------------------------------|-------------|---------------------------------------------------|--------------------|----------------------------------|-------------|
| ASV No.                    | Genus             | Phylum                           | % Abundance | ASV No.                 | Genus              | Phylum                           | % Abundance | ASV No.                                           | Genus              | Phylum                           | % Abundance |
| ASV64                      | Candida           | Ascomycota                       | 82.30       | ASV186                  | Sphaeroforma       | Ichthyosporia_phy_Incertae_sedis | 38.04       | ASV221                                            | Mucor              | Mucoromycota                     | 65.41       |
| ASV10                      | Haptocillium      | Ascomycota                       | 9.20        | ASV97                   | Alternaria         | Ascomycota                       | 25.00       | ASV97                                             | Alternaria         | Ascomycota                       | 14.91       |
| ASV186                     | Sphaeroforma      | Ichthyosporia_phy_Incertae_sedis | 3.68        | ASV342                  | Metschnikowia      | Ascomycota                       | 17.39       | ASV244                                            | unidentified_2488  | Rozellomycota                    | 5.77        |
| ASV97                      | Alternaria        | Ascomycota                       | 1.61        | ASV244                  | unidentified_2488  | Rozellomycota                    | 7.61        | ASV186                                            | Sphaeroforma       | Ichthyosporia_phy_Incertae_sedis | 5.37        |
| ASV244                     | unidentified_2488 | Rozellomycota                    | 1.18        | ASV1291                 | Wickerhamomyces    | Ascomycota                       | 3.26        | ASV871                                            | unidentified_99109 | Ascomycota                       | 2.19        |
|                            |                   |                                  |             | ASV451                  | Claviceps          | Ascomycota                       | 3.26        |                                                   |                    |                                  |             |
|                            |                   |                                  |             | ASV1208                 | unidentified_786   | Ascomycota                       | 2.17        |                                                   |                    |                                  |             |
|                            |                   |                                  |             | ASV871                  | unidentified_99109 | Ascomycota                       | 2.17        |                                                   |                    |                                  |             |
|                            |                   |                                  |             | ASV1107                 | Blumeria           | Ascomycota                       | 1.09        |                                                   |                    |                                  |             |
|                            |                   |                                  |             |                         |                    |                                  |             |                                                   |                    |                                  |             |
| seawater (SW)              |                   |                                  |             | stone biofilm (BF)      |                    |                                  |             |                                                   |                    |                                  |             |
| ASV No.                    | Genus             | Phylum                           | % Abundance | ASV No.                 | Genus              | Phylum                           | % Abundance |                                                   |                    |                                  |             |
| ASV97                      | Alternaria        | Ascomycota                       | 26.17       | ASV10                   | Haptocillium       | Ascomycota                       | 90.82       |                                                   |                    |                                  |             |
| ASV186                     | Sphaeroforma      | Ichthyosporia_phy_Incertae_sedis | 17.73       | ASV75                   | Cladosporium       | Ascomycota                       | 4.70        |                                                   |                    |                                  |             |
| ASV244                     | unidentified_2488 | Rozellomycota                    | 14.69       | ASV97                   | Alternaria         | Ascomycota                       | 3.35        |                                                   |                    |                                  |             |
| ASV75                      | Cladosporium      | Ascomycota                       | 13.98       |                         |                    |                                  |             |                                                   |                    |                                  |             |
| ASV342                     | Metschnikowia     | Ascomycota                       | 7.11        |                         |                    |                                  |             |                                                   |                    |                                  |             |
| ASV451                     | Claviceps         | Ascomycota                       | 4.30        |                         |                    |                                  |             |                                                   |                    |                                  |             |
| ASV440                     | unidentified_1163 | Chytridiomycota                  | 3.67        |                         |                    |                                  |             |                                                   |                    |                                  |             |
| ASV573                     | Pyrenophora       | Ascomycota                       | 2.89        |                         |                    |                                  |             |                                                   |                    |                                  |             |
| ASV568                     | Knufia            | Ascomycota                       | 1.64        |                         |                    |                                  |             |                                                   |                    |                                  |             |
